# Supplementary material
Source: PubMed Central journal article supplement (PMC2556826)
Supplement: pp.108.122622_1.pdf [file pp.108.122622_1.pdf]

**Table SI.** *The relative change in metabolites between WT and *pmdh1pmdh2* mutants.*

The ratio of various metabolites in the double *pmdh1pmdh2* mutants to wild-type (WT) plants. Leaf disks were sampled from the leaf chamber attached to the mass spectrometer after the 10 min at the CO<sub>2</sub> compensation point. Tissue was removed directly from the chamber into liquid nitrogen and stored at -80°C. Shown are the means ± the SE ratios from five leaves from taken from separate plants. Statistical analysis was conducted using a student-t test.

|                     | Ratio of <i>pmdh1pmdh2</i> /WT | <i>p</i> values |
|---------------------|--------------------------------|-----------------|
| Aspartic acid       | 0.3                            | 0.00            |
| Glutamine           | 0.6                            | 0.03            |
| Asparagine          | 0.8                            | 0.31            |
| Lysine              | 0.9                            | 0.84            |
| Beta-Alanine        | 0.9                            | 0.58            |
| Proline             | 0.9                            | 0.91            |
| L-Tyrosine          | 1.0                            | 0.99            |
| Threonine           | 1.0                            | 0.96            |
| Iso-Leucine         | 1.0                            | 0.75            |
| Phenylalanine       | 1.0                            | 0.80            |
| Valine              | 1.1                            | 0.36            |
| L-Glutamic acid     | 1.1                            | 0.60            |
| Glycolic acid       | 1.1                            | 0.23            |
| Glyoxylic acid      | 1.1                            | 0.27            |
| Glyceric acid       | 1.2                            | 0.36            |
| Leucine             | 1.2                            | 0.28            |
| Succinic acid       | 1.2                            | 0.21            |
| Fumaric acid        | 1.3                            | 0.23            |
| Alanine             | 1.3                            | 0.19            |
| 2-Aminobutyric acid | 1.3                            | 0.29            |
| Malic acid          | 1.5                            | 0.05            |
| Citramalic acid     | 1.5                            | 0.39            |
| Glycine             | 1.5                            | 0.00            |
| L-Methionine        | 1.5                            | 0.02            |
| Serine              | 1.6                            | 0.01            |
| Citric acid         | 1.7                            | 0.05            |
| 2-Ketoglutaric acid | 3.6                            | 0.00            |
| Iso-citrate         | 7.5                            | 0.01            |
